# Supplementary material for: Behaviorally Activated mRNA Expression Profiles Produce Signatures of Learning and Enhanced Inhibition in Aged Rats with Preserved Memory
Source: PubMed Central journal article supplement (PMC3862806; doi:10.1371/journal.pone.0083674), 2013-12-13
Supplement: pone.0083674.s003.pdf [file pone.0083674.s003.pdf]

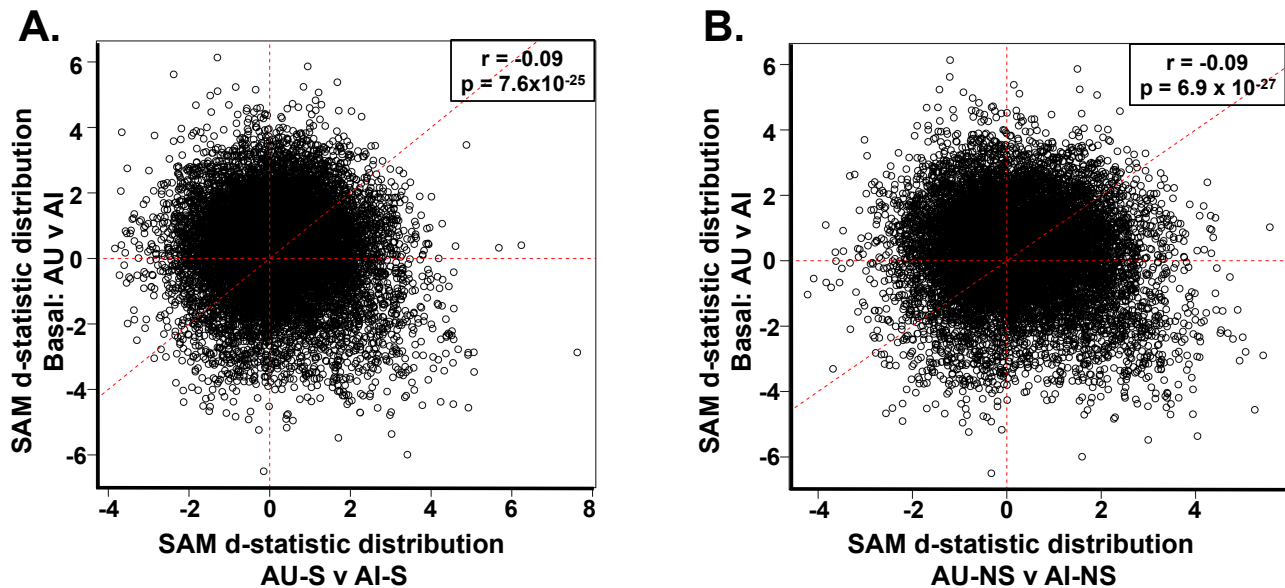

**Figure S3. Spatial and Non-spatial protocols induce expression profiles distinct from basal expression.** **A.** SAM d-statistics for each probeset derived from basal aged dataset AU v AI comparison [14] are plotted on the Y-axis against the corresponding data derived from AU-S v AI-S comparison on the X-axis. A slight negative correlation was found ( $r=-0.09$ ;  $p=7.6 \times 10^{-25}$ ) that was significant only because of the large number of data points ( $N>15,000$  probesets). The lack of positive correlation indicated little similarity between the spatial and basal profiles. **B.** SAM d-statistics for each probeset derived from basal aged dataset AU v AI comparison are plotted on the Y-axis against the corresponding data derived from the NS data (AU-NS v AI-NS) on the X-axis. A slight negative correlation was found ( $r=-0.09$ ;  $p=6.9 \times 10^{-27}$ ) that was significant only because of the large number of data points ( $N>15,000$  probesets). The lack of positive correlation indicated little similarity between the NS and basal profiles.
